# Supplementary material
Source: PubMed Central journal article supplement (PMC7382278)
Supplement: pnas.2007136117.sapp.pdf [file pnas.2007136117.sapp.pdf]

**Supporting Information (SI Appendix):**

**Calpain Inhibitor and Ibudilast Rescue  $\beta$ -Cell Function  
in a Cellular Model of Wolfram Syndrome**

Lien D. Nguyen<sup>1,2\*</sup>, Tom T. Fischer<sup>1,3\*</sup>, Damien Abreu<sup>4,5</sup>, Alfredo Arroyo<sup>1</sup>, Fumihiko Urano<sup>4,6</sup>,  
and Barbara E. Ehrlich<sup>1,2#</sup>

\*These authors contributed equally to the work

#Corresponding author: [barbara.ehrlich@yale.edu](mailto:barbara.ehrlich@yale.edu)

<sup>1</sup> Department of Pharmacology, Yale University, New Haven, CT-06520, USA

<sup>2</sup> Interdepartmental Neuroscience Program, Yale University, New Haven, CT-06520, USA

<sup>3</sup> Institute of Pharmacology, University of Heidelberg, Germany

<sup>4</sup> Department of Medicine, Division of Endocrinology, Metabolism, and Lipid Research, Washington University School of Medicine, St. Louis, MO 63110, USA

<sup>5</sup> Medical Scientist Training Program, Washington University School of Medicine, St. Louis, MO 63110, USA

<sup>6</sup> Department of Pathology and Immunology, Washington University School of Medicine, St. Louis, MO 63110, USA

## **Supplementary methods:**

### **Calcium imaging with Fluo-4-AM**

Buffers were prepared following the same protocol as described for calcium imaging with Fura-2-AM (see method section of the manuscript). Fura-4-AM dye powder (Thermo Fisher) was dissolved to 4 $\mu$ M in calcium-containing HEPES buffer supplemented with 0.03% Pluronic acid (Thermo Fisher).

For measurements of ER-calcium release, cells were plated at a density of 2x10<sup>5</sup> cells per coverslip. After 48 hours, calcium imaging was carried out as described for Fura-2-AM. Following stimulation with 50nM ATP, cells were imaged using sequential excitation at 488 nm, and images were acquired with emission bandwidth of 501 to 555 nm. After background subtraction, data were normalized to the first 10 sec of baseline recording. Subsequent data quantification was performed as described for Fura-2-AM. All figures depicting calcium imaging traces show the average of 5-12 coverslips, each with 40-70 cells, from at least 3 independent recordings.

For measurements of cytosolic calcium, 2.5x10<sup>4</sup> cells were plated per well on a black, clear-bottom 96-well plate. After 48 hours, wells were carefully washed two times with calcium-containing HEPES-buffered saline solution. Then, cells were incubated in Fluo-4-AM dye solution for 45 min in the dark at room temperature. After washing off the dye, cells were kept in calcium-containing HEPES-buffered saline solution and imaged with a Tecan Infinite M1000 Pro microplate reader using the following setting: 2 sec linear shaking (2mm, 654 rpm), followed by imaging in fluorescence mode with 40 $\mu$ sec integration time.

### **mRNA analysis**

mRNA was isolated from INS1 cells grown to confluency using the RNeasy Mini kit (Qiagen) and reverse-transcribed to complementary DNA (cDNA) using the High-Capacity cDNA Reverse Transcription Kit (Applied Biosystems). For real-time reverse transcription PCR, 40 ng of cDNA was used as template in a reaction with POWER SYBR Green MasterMix (Life Technologies) in a 7500 Fast machine (Applied Biosystems). Each sample was run as three technical replicates on a 96-well plate. Fold change in mRNA transcript levels was determined by using the  $\Delta$ Ct method [1]. 18S was used as a control. The following primers were used: rat 18S ( *fwd, 5' CATTGAAACGTCTGCCCTAT 3'; rev, 5' GTTTCTCAGGCTCCCTCTCC 3'*), rat NCS1 ( *fwd, 5' GGAGACCCCACCAAGTTTCG 3'; rev, 5' AACTCGATCCTGCCATCCTTG 3'*).

### **Subcellular fractionation**

Subcellular fractionation to obtain homogenate, membrane, cytosolic, and mitochondrial fractions was carried out following the protocol provided by Abcam (R. Patten). Lysis buffer contained 250mM Sucrose, 20mM HEPES (pH 7.4), 10mM KCl, 1.5mM MgCl<sub>2</sub>, 1mM EDTA, and 1mM EGTA. Cell lysate obtained from a 15cm dish of confluent INS1 cells was passed through a 25G needle and centrifuged repeatedly resulting in the different fractions step by step. Additionally, we prepared crude mitochondrial extracts from HEK293 lysate using a mitochondrial extraction kit (Thermo Fisher, #89874). A cell suspension in HEK cell media (DMEM high glucose, 5% FBS, 1% PenStrep) was collected using TrypLE and pelleted at 850xg for 2 min. Between steps of centrifuging and vortexing, the reagents provided in the kit were added to the pellet step by step. Finally, mitochondria were lysed in 2% CHAPS with tris buffer. For further analysis, fractionation samples were prepared for Western Blot (see method section of the manuscript).

## Supplementary figures:

### A Design of gRNA

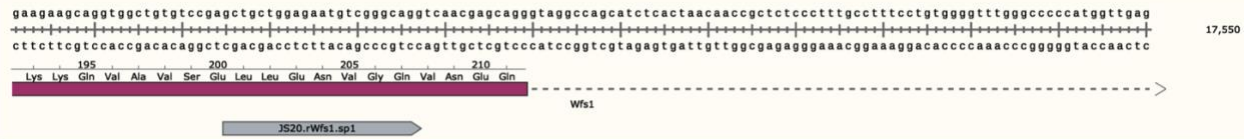

### B Details of gRNA (CRISPOR tool)

| Position/<br>Strand | Guide Sequence + PAM<br>+ Restriction Enzymes<br>+ Variants                                   | Specificity<br>Score | Predicted Efficiency<br>Show all scores |                  | Out-of-Frame<br>score | Off-targets for<br>0-1-2-3-4<br>mismatches<br>+ next to PAM |
|---------------------|-----------------------------------------------------------------------------------------------|----------------------|-----------------------------------------|------------------|-----------------------|-------------------------------------------------------------|
| 157 / fw            | GCTGCTGGAGAATGTCGGGC AGG<br>Enzymes: <i>Hpy166II</i> , <i>HincII</i><br>Cloning / PCR primers | 82                   | 56<br>Doench '16                        | 42<br>Mor-Mateos | 48                    | 0-0-0-6-158<br>0-0-0-0-0<br>164 off-targets                 |

### C Deep sequencing results: *left*: genotyping of clones on 96-well plates, *right*: confirmation of genotype after expansion

| Sample | Total | WT_g1        | #1-Indel | #1-Reads(%)  | #2-Indel | #2-Reads(%)  | Sample    | Total | WT_g1        | #1-Indel | #1-Reads(%)  | #2-Indel | #2-Reads(%) |
|--------|-------|--------------|----------|--------------|----------|--------------|-----------|-------|--------------|----------|--------------|----------|-------------|
| 1E11   | 1525  | 0 (0.0%)     | 1        | 889 (58.3%)  | 32       | 625 (41.0%)  | Clone 1E1 | 1488  | 0 (0.0%)     | 1        | 838 (56.3%)  | 32       | 639 (42.9%) |
| 4F1    | 2022  | 0 (0.0%)     | -4       | 1012 (50.0%) | 1        | 1004 (49.7%) | Clone 7B7 | 1229  | 1129 (91.9%) | 0        | 1216 (98.9%) | -1       | 11 (0.9%)   |
| 7B7    | 1605  | 1513 (94.3%) | 0        | 1578 (98.3%) |          |              | Clone 4F1 | 1459  | 0 (0.0%)     | 1        | 735 (50.4%)  | -4       | 710 (48.7%) |

### D Sequencing Alignments

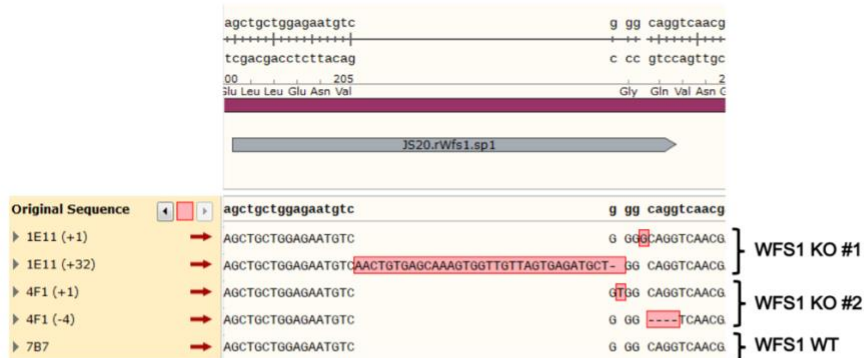

### E Verification of WFS1 knockout (KO) in INS1 cells via Western blot

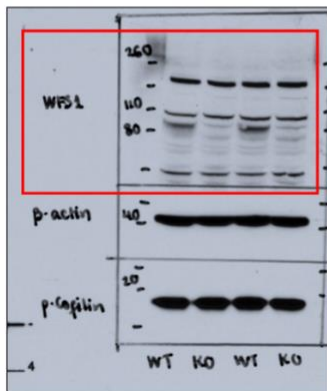

**Figure S1. WFS1-WT control and WFS1-KO cell lines were generated using CRISPR-Cas by the Genome Engineering and iPSC Center at Washington University in St. Louis. (A) gRNA was designed to target an early, conserved exon of WFS1. (B) Details of gRNA design using CRISPOR. (C) Sequencing**

results for the cell clones obtained. KO cell lines show out-of-frame indels (insertion or deletion mutations) in all alleles that result in immature stop codons before a.a. 230 (of 890) and lead to non-sense mediated decay of mRNA. (D) Indels aligned with WFS1-sequence. (E) Loss of WFS1 protein expression was verified using Western blot. Shown is uncropped blot of two independent preparations. In addition to the WFS1 band slightly above the 80kDa marker, the antibody used also resulted in several unspecific bands.

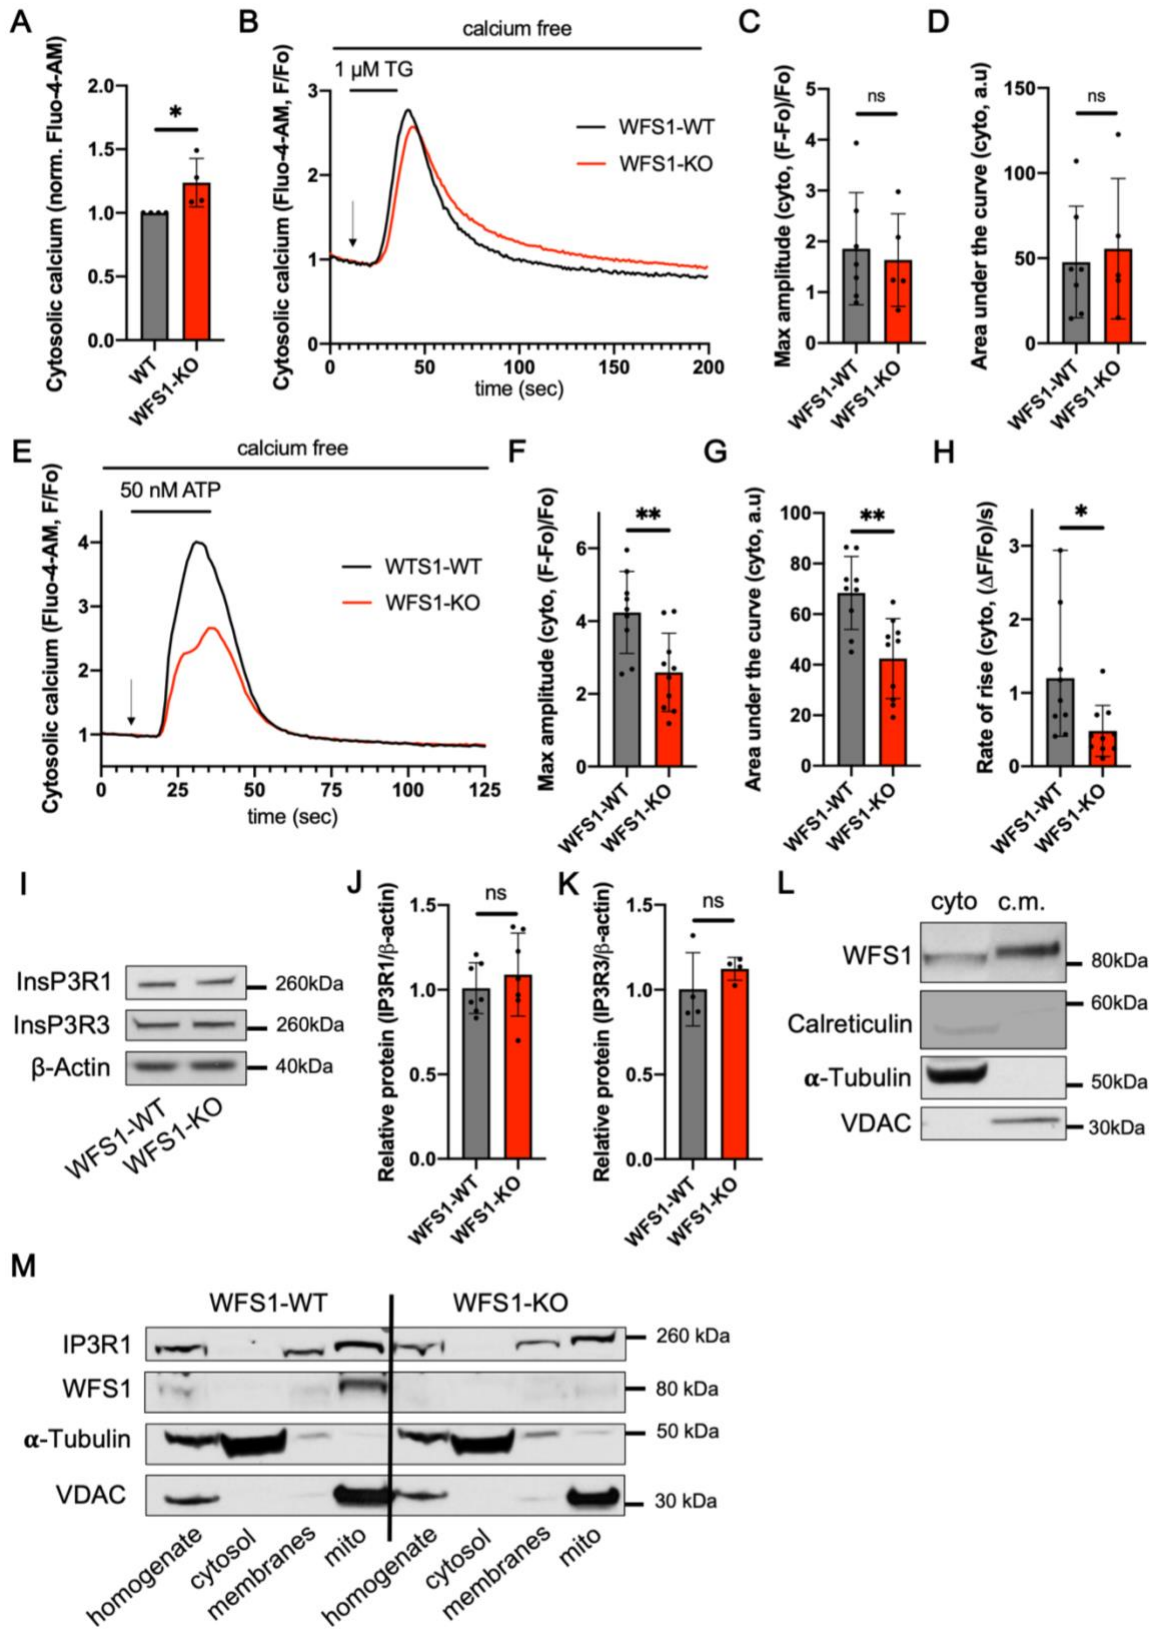

**Figure S2. WFS1 regulates intracellular calcium homeostasis in INS1 cells.** (A) WFS1-KO cells showed a significant elevation of cytosolic calcium compared to WFS1-WT cells. (B) Panel shows averaged traces of 5-6 coverslips for each cell line in response to 1 $\mu$ M thapsigargin. The Fluo-4-AM signal was normalized to the intensity at 10 sec. (C, D) Quantification of area under the curve and max amplitude for cytosolic calcium traces shown in B, no difference was observed. (E) Panel shows averaged traces of 9-10 coverslips for each cell type in response to 50nM ATP. The fluo-4-AM signal was normalized to the intensity at 10 sec. (F-H) Compared to WFS1-WT cells, WFS1-KO cells showed decreased area under the curve, max amplitude, and rate of rise for the cytosolic calcium traces shown in E. (I) Representative blot of InsP3R1 and InsP3R3 protein abundance in WFS1-WT and WFS1-KO cells. (J-K) Quantification of I (from 4-7 independent preparations) showed no difference in InsP3R1 and InsP3R3 expression in both cell lines. (L) Representative blot of subcellular fractionations isolated from HEK293 cells; cyto = cytosol; c.m. = crude mitochondria, containing mitochondria and MAMs. Tubulin was used as a marker for cytosolic proteins, VDAC for mitochondrial proteins, and calreticulin for non-MAM ER-proteins. (M) Representative blot of subcellular fractionations obtained from INS1 WFS1-WT and WFS1-KO cells. Same markers used as in L.

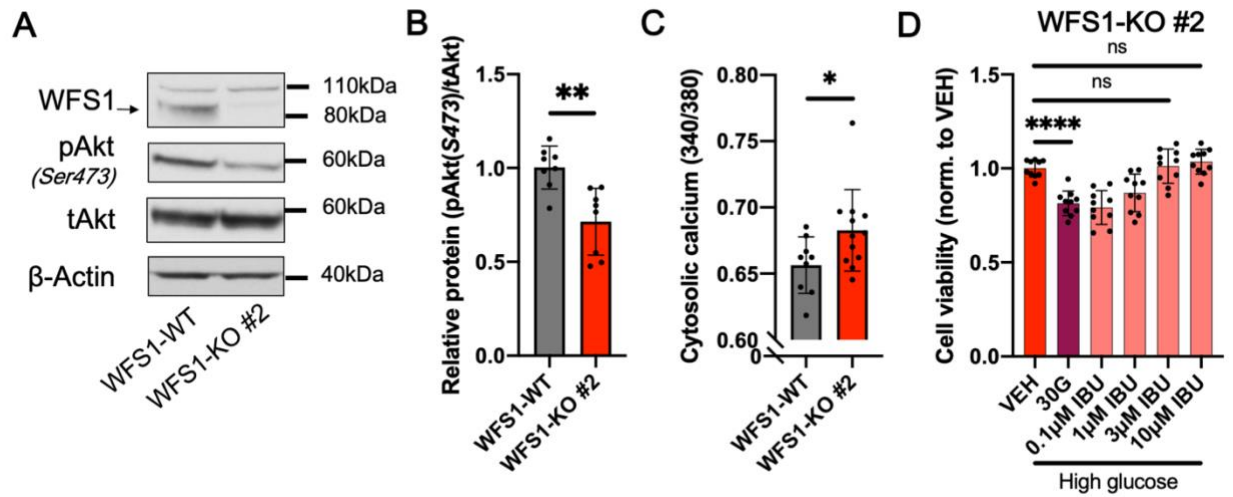

**Figure S3. Validation of key findings in a second CRISPR-WFS1-KO INS1 clone.** (A) Representative blot confirming the loss of WFS1 in WFS1-KO clone 2, and showing protein abundance of pAkt (S473) and tAkt. (B) Quantification of B (from 7 independent preparations). (C) WFS1-KO clone #2 cells exhibited significantly elevated cytosolic calcium compared to WFS1-WT cells. (D) High glucose-induced loss of cell viability in WFS1-KO clone #2 cells was dose-dependently reversed by ibudilast, 30G = 30 mM additional glucose, IBU = ibudilast.



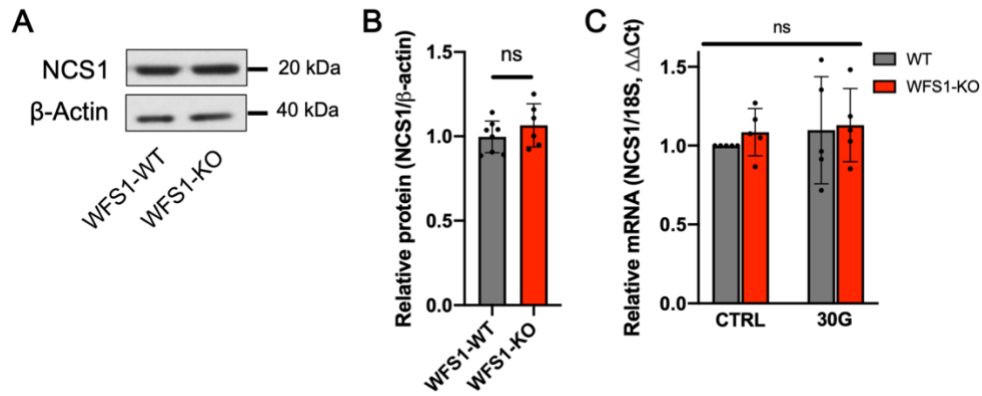

**Figure S4. NCS1 protein and mRNA levels in WFS1-WT and WFS1-KO cells.** (A) Representative blot showing NCS1 protein abundance. (B) Quantification of A (from 6-8 independent preparations), normalized to WT, no difference was observed between cell lines. (C) Quantification of 5 independent qPCR experiments, no difference was observed between the different conditions, 30G = 30 mM additional glucose.

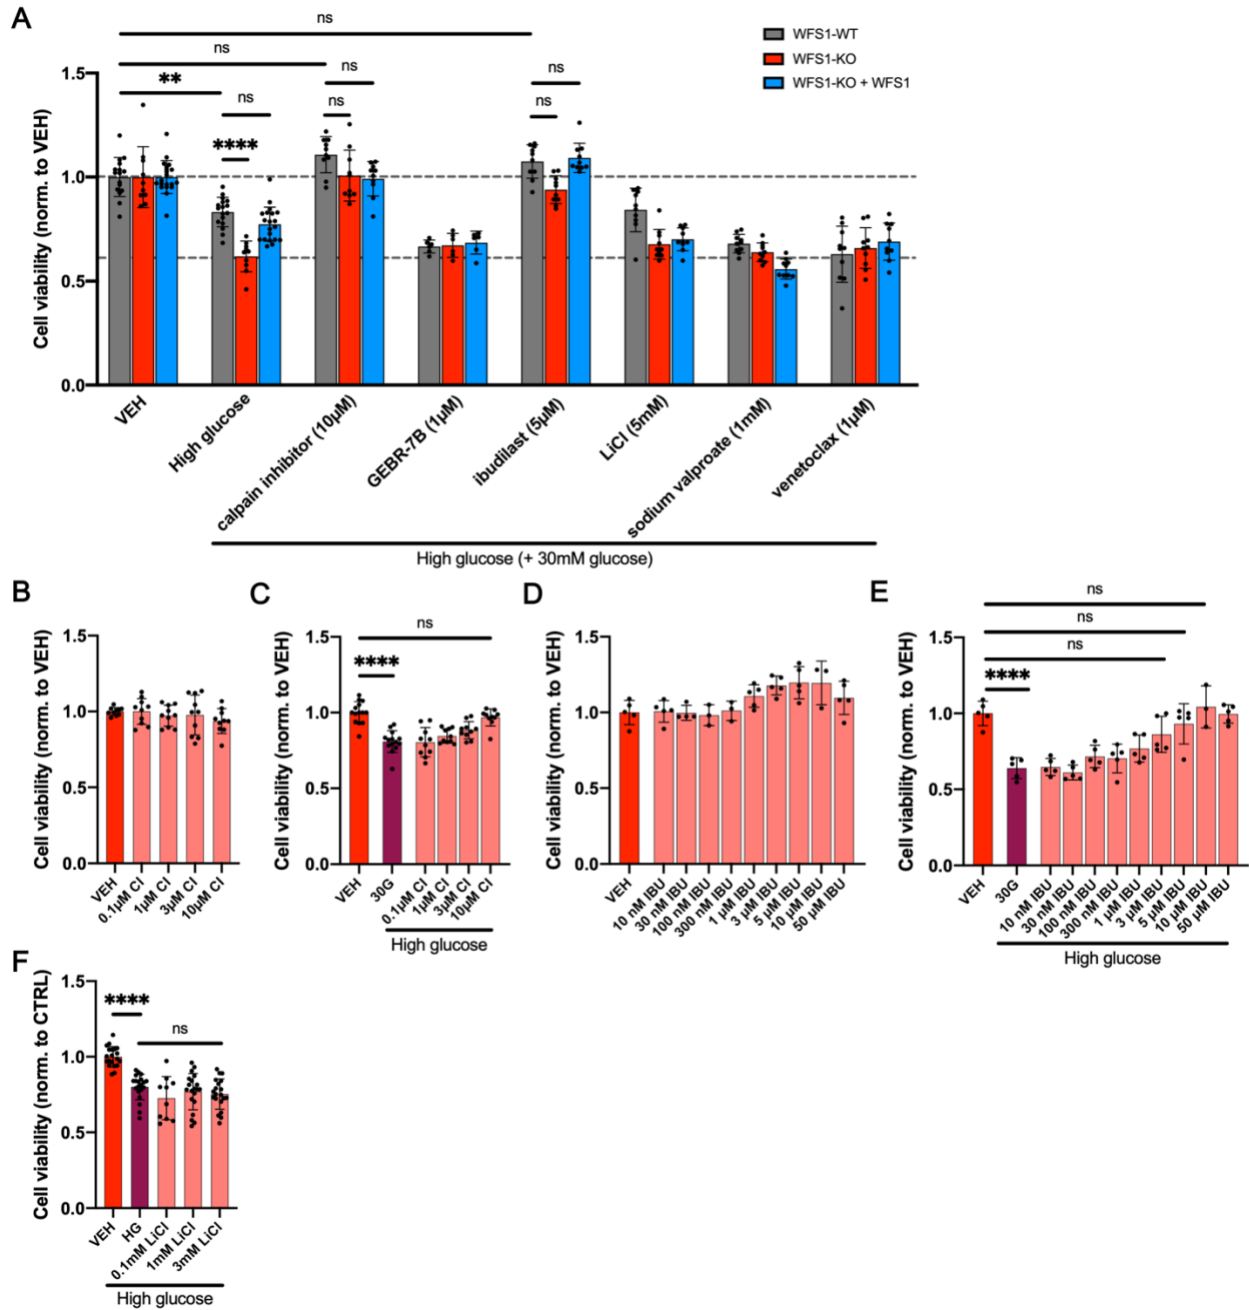

**Figure S5. Drug screen for compounds that rescue cell viability in WFS1-KO cells.** Compounds were selected to target WFS1, NCS1, and/or calcium signaling. (A) Preliminary screening of various drugs to prevent glucose toxicity. Following treatment with 30 mM additional glucose (30G, 48h), WFS1-WT, WFS1-KO, and WFS1-OE cells showed significant cell death as compared to cells cultured in normal medium. However, WFS1-KO cells showed more severe cell death compared to WFS1-WT and WFS1-OE cells following high glucose. Of the 7 compounds tested, calpain inhibitor XI and ibudilast rescued cell viability back to a normal level. (B) Calpain inhibitor XI did not affect cell viability in WFS1-KO cells at baseline. (C) Calpain inhibitor XI dose-dependently reversed high glucose-induced loss of cell viability in WFS1-KO cells.

(D) Ibutilast slightly raised cell viability in WFS1-KO cells at baseline. (E) Ibutilast dose-dependently reversed high glucose-induced loss of cell viability in WFS1-KO cells. (F) Lithium did not reverse hyperglycemia-induced loss of cell viability in WFS1-KO cells.

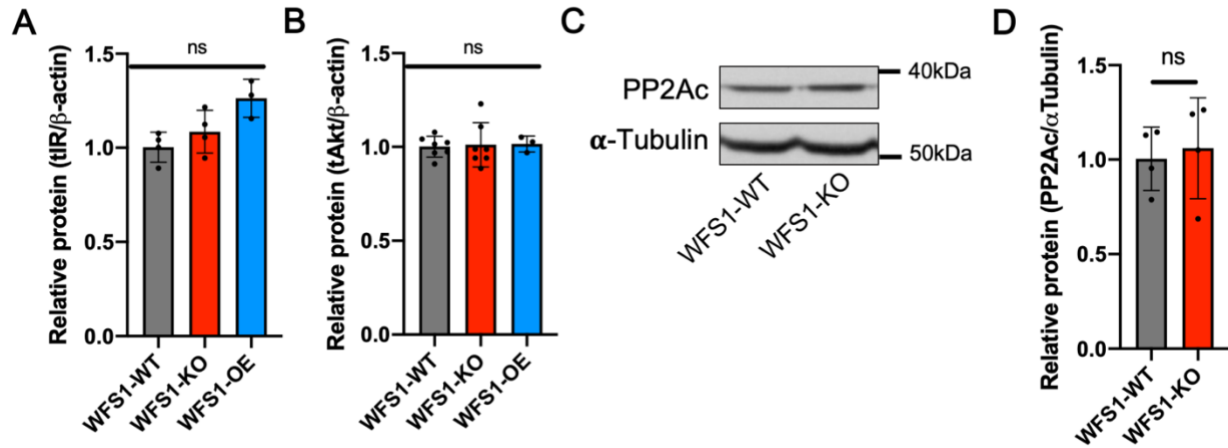

**Figure S6. Total IR, total Akt, and PP2Ac protein levels in WFS1-WT and WFS1-KO cells.** (A) Total IR and (B) total Akt protein levels were not changed, representative blot shown in Fig. 5 A. (C) Representative blot showing protein abundance of the catalytic subunit of protein phosphatase 2A (PP2Ac) in WFS1-WT and WFS1-KO cells. (D) Quantification of C (from 4 independent preparations), no significant difference was observed between cell lines.

**Table S1:** List of primary antibodies used.

| <b>Antibody</b>                                                                                      | <b>Source</b>            | <b>Identifier</b> |
|------------------------------------------------------------------------------------------------------|--------------------------|-------------------|
| WFS1                                                                                                 | Proteintech              | 11558-1-AP        |
| $\beta$ -Actin                                                                                       | Cell Signaling           | 8H10D10           |
| NCS1                                                                                                 | Santa Cruz               | FL-190            |
| phospho-Akt (pAkt) (S473)                                                                            | Cell Signaling           | #4060             |
| phospho-Akt (pAkt) (T308)                                                                            | Cell Signaling           | #9275             |
| total-Akt (tAkt)                                                                                     | Cell Signaling           | #2920             |
| Phospho-IGF-I Receptor $\beta$ (Tyr1135/1136)/Insulin Receptor $\beta$ (Tyr1150/1151) (pIR $\beta$ ) | Cell Signaling           | #3024             |
| total-Insulin-Receptor (tIR)                                                                         | Gift from Dr. G. Shulman |                   |
| Calreticulin                                                                                         | Cell Signaling           | #12238            |
| Inositol trisphosphate receptor isoform 1 (InsP3R1)                                                  | Homemade production      |                   |
| Inositol trisphosphate receptor isoform 3 (InsP3R3)                                                  | BD biosciences           | 610312            |
| $\alpha$ -Tubulin                                                                                    | Abcam                    | ab7291            |
| VDAC                                                                                                 | Abcam                    | ab34726           |
| PP2A c subunit                                                                                       | Cell signaling           | #2259             |

**Table S2:** Detailed statistical analysis for Figures 1-5. All data were included in statistical testing, relevant p-values are shown below.

| Fig. | Statistical test          | P-value    | Post-hoc test pairwise comparison                                                                                                                                                                                                                                                                                                                                                                             |
|------|---------------------------|------------|---------------------------------------------------------------------------------------------------------------------------------------------------------------------------------------------------------------------------------------------------------------------------------------------------------------------------------------------------------------------------------------------------------------|
| 1B   | One-way ANOVA             | p = 0.0006 | WFS1-WT vs. WFS1-KO: p = 0.0004<br>WFS1-WT vs. WFS1-OE: p = 0.1463<br>WFS1-KO vs. WFS1-OE: p = 0.009                                                                                                                                                                                                                                                                                                          |
| 1C   | Two-tailed student t-test | p = 0.0002 |                                                                                                                                                                                                                                                                                                                                                                                                               |
| 1E   | One-way ANOVA             | p = 0.0005 | WFS1-WT vs. WFS1-KO: p = 0.0004<br>WFS1-WT vs. WFS1-OE: p = 0.1568<br>WFS1-KO vs. WFS1-OE: p = 0.0096                                                                                                                                                                                                                                                                                                         |
| 1F   | One-way ANOVA             | p < 0.0001 | WFS1-WT vs. WFS1-KO: p < 0.0001<br>WFS1-WT vs. WFS1-OE: p < 0.0001<br>WFS1-KO vs. WFS1-OE: p = 0.0456                                                                                                                                                                                                                                                                                                         |
| 1G   | One-way ANOVA             | p = 0.0215 | WFS1-WT vs. WFS1-KO: p = 0.0345<br>WFS1-WT vs. WFS1-OE: p = 0.8356<br>WFS1-KO vs. WFS1-OE: p = 0.0420                                                                                                                                                                                                                                                                                                         |
| 1H   | Two-tailed student t-test | p = 0.0021 |                                                                                                                                                                                                                                                                                                                                                                                                               |
| 1I   | Two-tailed student t-test | p = 0.0037 |                                                                                                                                                                                                                                                                                                                                                                                                               |
| 1J   | Two-tailed student t-test | p = 0.0001 |                                                                                                                                                                                                                                                                                                                                                                                                               |
| 2A   | One-way ANOVA             | p = 0.0002 | WFS1-WT CTRL vs. WFS1-KO CTRL: p = 0.0005<br>WFS1-WT CTRL vs. WFS1-WT 30G: p = 0.0319<br>WFS1-KO CTRL vs. WFS1-KO 30G: p = 0.9214<br>WFS1-WT 30G vs. WFS1-KO 30G: p = 0.1954                                                                                                                                                                                                                                  |
| 2C   | One-way ANOVA             | p < 0.0001 | WFS1-WT CTRL vs. WFS1-WT 15G: p < 0.0001<br>WFS1-WT CTRL vs. WFS1-WT 30G: p < 0.0001<br>WFS1-WT 15G vs. WFS1-WT 30G: p = 0.0040<br><br>WFS1-KO CTRL vs. WFS1-KO 15G: p = 0.0219<br>WFS1-KO CTRL vs. WFS1-KO 30G: p < 0.0001<br>WFS1-KO 15G vs. WFS1-KO 30G: p = 0.6517<br><br>WFS1-WT CTRL vs. WFS1-KO CTRL: p < 0.0001<br>WFS1-WT 15G vs. WFS1-KO 15G: p = 0.0466<br>WFS1-WT 30G vs. WFS1-KO 30G: p = 0.9469 |

|    |               |              |                                                                                                                                                                                                                                                                                                                                                                                                                                                                                                                                                                                                                                                                                          |
|----|---------------|--------------|------------------------------------------------------------------------------------------------------------------------------------------------------------------------------------------------------------------------------------------------------------------------------------------------------------------------------------------------------------------------------------------------------------------------------------------------------------------------------------------------------------------------------------------------------------------------------------------------------------------------------------------------------------------------------------------|
|    |               |              | <p>WFS1-WT 15G vs. WFS1-KO CTRL: <math>p = 0.9996</math><br/> WFS1-WT 30G vs. WFS1-KO 15G: <math>p = 0.9841</math></p>                                                                                                                                                                                                                                                                                                                                                                                                                                                                                                                                                                   |
| 2D | One-way ANOVA | $p < 0.0001$ | <p>WFS1-WT CTRL vs. WFS1-WT 15G: <math>p &lt; 0.0001</math><br/> WFS1-WT CTRL vs. WFS1-WT 30G: <math>p &lt; 0.0001</math><br/> WFS1-WT 15G vs. WFS1-WT 30G: <math>p = 0.0072</math></p> <p>WFS1-KO CTRL vs. WFS1-KO 15G: <math>p = 0.0062</math><br/> WFS1-KO CTRL vs. WFS1-KO 30G: <math>p &lt; 0.0001</math><br/> WFS1-KO 15G vs. WFS1-KO 30G: <math>p = 0.5243</math></p> <p>WFS1-WT CTRL vs. WFS1-KO CTRL: <math>p &lt; 0.0001</math><br/> WFS1-WT 15G vs. WFS1-KO 15G: <math>p = 0.0618</math><br/> WFS1-WT 30G vs. WFS1-KO 30G: <math>p = 0.7928</math></p> <p>WFS1-WT 15G vs. WFS1-KO CTRL: <math>p = 0.9998</math><br/> WFS1-WT 30G vs. WFS1-KO 15G: <math>p = 0.9946</math></p> |
| 2E | One-way ANOVA | $p < 0.0001$ | <p>WFS1-WT CTRL vs. WFS1-WT 15G: <math>p = 0.1663</math><br/> WFS1-WT CTRL vs. WFS1-WT 30G: <math>p &lt; 0.0001</math><br/> WFS1-WT 15G vs. WFS1-WT 30G: <math>p = 0.0005</math></p> <p>WFS1-KO CTRL vs. WFS1-KO 15G: <math>p = 0.1327</math><br/> WFS1-KO CTRL vs. WFS1-KO 30G: <math>p = 0.0006</math><br/> WFS1-KO 15G vs. WFS1-KO 30G: <math>p = 0.7635</math></p> <p>WFS1-WT CTRL vs. WFS1-KO CTRL: <math>p &lt; 0.0001</math><br/> WFS1-WT 15G vs. WFS1-KO 15G: <math>p = 0.0060</math><br/> WFS1-WT 30G vs. WFS1-KO 30G: <math>p = 0.9514</math></p> <p>WFS1-WT 15G vs. WFS1-KO CTRL: <math>p = 0.4714</math><br/> WFS1-WT 30G vs. WFS1-KO 15G: <math>p = 0.9956</math></p>       |

|    |                           |            |                                                                                                                                                                                                                                                                                                                                                                                                                                                                                        |
|----|---------------------------|------------|----------------------------------------------------------------------------------------------------------------------------------------------------------------------------------------------------------------------------------------------------------------------------------------------------------------------------------------------------------------------------------------------------------------------------------------------------------------------------------------|
| 3C | One-way ANOVA             | p < 0.0001 | WFS1-WT CTRL vs. WFS1-WT 30G: p = 0.0003<br>WFS1-KO CTRL vs. WFS1-KO 30G: p = 0.0366                                                                                                                                                                                                                                                                                                                                                                                                   |
| 3F | One-way ANOVA             | p < 0.0001 | WFS1-WT vs. WFS1-KO: p = 0.0062<br>WFS1-WT vs. e.v.: p = 0.0029<br>WFS1-KO vs. e.v.: p = 0.8839<br>WFS1-WT vs. NCS1-OE: p = 0.9820<br>WFS1-KO vs. NCS1-OE: p = 0.0046<br>e.v. vs. NCS1-OE: p = 0.0006                                                                                                                                                                                                                                                                                  |
| 3G | One-way ANOVA             | p < 0.0001 | WFS1-WT vs. WFS1-KO: p = 0.0019<br>WFS1-WT vs. e.v.: p = 0.0007<br>WFS1-KO vs. e.v.: p = 0.8635<br>WFS1-WT vs. NCS1-OE: p = 0.2083<br>WFS1-KO vs. NCS1-OE: p < 0.0001<br>e.v. vs. NCS1-OE: p < 0.0001                                                                                                                                                                                                                                                                                  |
| 3H | One-way ANOVA             | p = 0.0003 | WFS1-WT vs. WFS1-KO: p = 0.0934<br>WFS1-WT vs. e.v.: p = 0.0354<br>WFS1-KO vs. e.v.: p = 0.9928<br>WFS1-WT vs. NCS1-OE: p = 0.9789<br>WFS1-KO vs. NCS1-OE: p = 0.0186<br>e.v. vs. NCS1-OE: p = 0.0009                                                                                                                                                                                                                                                                                  |
| 3I | One-way ANOVA             | p = 0.0298 | WFS1-WT vs. WFS1-KO: p = 0.0449<br>WFS1-WT vs. NCS1-OE: p = 0.9111<br>WFS1-KO vs. NCS1-OE: p = 0.0462                                                                                                                                                                                                                                                                                                                                                                                  |
|    |                           |            |                                                                                                                                                                                                                                                                                                                                                                                                                                                                                        |
| 4A | Two-tailed student t-test | p = 0.6171 |                                                                                                                                                                                                                                                                                                                                                                                                                                                                                        |
| 4C | One-way ANOVA             | p < 0.0001 | WFS1-WT CTRL vs. WFS1-WT 30G: p = 0.1259<br>WFS1-WT CTRL vs. WFS1-WT 30G + CI: p = 0.4930<br>WFS1-WT CTRL vs. WFS1-WT 30G + IBU: p > 0.9999<br><br>WFS1-KO CTRL vs. WFS1-KO 30G: p < 0.0001<br>WFS1-KO CTRL vs. WFS1-KO 30G + CI: p > 0.9999<br>WFS1-KO CTRL vs. WFS1-KO 30G + IBU: p = 0.8563<br><br>WFS1-WT 30G vs. WFS1-KO 30G: p < 0.0001<br>WFS1-WT CI vs. WFS1-KO CI: p > 0.9999<br>WFS1-WT IBU vs. WFS1-KO IBU: p = 0.9980<br>WFS1-WT 30G + CI vs. WFS1-KO 30G + CI: p = 0.5953 |



|    |                           |            |                                                                                                                                                                                                                                                                                                                                                                                                                                                                                                                                                                                                                                                                                                                                                                                                                                                                                      |
|----|---------------------------|------------|--------------------------------------------------------------------------------------------------------------------------------------------------------------------------------------------------------------------------------------------------------------------------------------------------------------------------------------------------------------------------------------------------------------------------------------------------------------------------------------------------------------------------------------------------------------------------------------------------------------------------------------------------------------------------------------------------------------------------------------------------------------------------------------------------------------------------------------------------------------------------------------|
|    |                           |            | WFS1-WT 30G + IBU vs. WFS1-KO 30G + IBU: p = 0.9861                                                                                                                                                                                                                                                                                                                                                                                                                                                                                                                                                                                                                                                                                                                                                                                                                                  |
| 4D | One-way ANOVA             | p < 0.0001 | WFS1-WT CTRL vs. WFS1-KO CTRL: p < 0.0001<br>WFS1-WT CTRL vs. WFS1-WT C.I.: p = 0.9940<br>WFS1-WT CTRL vs. WFS1-KO C.I.: p = 0.6244<br>WFS1-KO CTRL vs. WFS1-KO C.I.: p = 0.0007                                                                                                                                                                                                                                                                                                                                                                                                                                                                                                                                                                                                                                                                                                     |
| 4E | One-way ANOVA             | p = 0.0029 | WFS1-WT CTRL vs. WFS1-KO CTRL: p = 0.0097<br>WFS1-WT CTRL vs. WFS1-WT IBU: p = 0.9942<br>WFS1-WT CTRL vs. WFS1-KO IBU.: p = 0.9002<br>WFS1-KO CTRL vs. WFS1-KO IBU: p = 0.0484                                                                                                                                                                                                                                                                                                                                                                                                                                                                                                                                                                                                                                                                                                       |
|    |                           |            |                                                                                                                                                                                                                                                                                                                                                                                                                                                                                                                                                                                                                                                                                                                                                                                                                                                                                      |
| 5A | One-way ANOVA             | p < 0.0001 | WFS1-WT CTRL 2.5G vs. WFS1-KO CTRL 2.5G: p = 0.6053<br>WFS1-WT 9G CTRL vs. WFS1-KO 9G CTRL: p = 0.0328<br>WFS1-WT CTRL 2.5G vs. WFS1-WT CTRL 9G: p = 0.0008<br>WFS1-KO CTRL 2.5G vs. WFS1-KO CTRL 9G: p = 0.0664<br><br>WFS1-WT CTRL 2.5G vs. WFS1-WT C.I. 2.5G: p > 0.9999<br>WFS1-WT CTRL 9G vs. WFS1-WT C.I. 9G: p > 0.9999<br>WFS1-WT C.I. 2.5G vs. WFS1-KO C.I. 2.5G: p > 0.9999<br>WFS1-WT C.I. 9G C.I. vs. WFS1-KO C.I. 9G: p = 0.8072<br>WFS1-WT C.I. 2.5G vs. WFS1-WT C.I. 9G: p = 0.0006<br>WFS1-KO C.I. 2.5G vs. WFS1-KO C.I. 9G: p = 0.0236<br><br>WFS1-WT CTRL 2.5G vs. WFS1-WT IBU 2.5G: p = 0.0005<br>WFS1-WT CTRL 9G vs. WFS1-WT IBU 9G: p = 0.0244<br>WFS1-WT IBU 2.5G vs. WFS1-KO IBU 2.5G: p > 0.9999<br>WFS1-WT IBU 9G C.I. vs. WFS1-KO IBU 9G: p = 0.9998<br>WFS1-WT IBU 2.5G vs. WFS1-WT IBU 9G: p = 0.0355<br>WFS1-KO IBU 2.5G vs. WFS1-KO IBU 9G: p = 0.0010 |
| 5C | One-way ANOVA             | p < 0.0001 | WFS1-WT vs. WFS1-KO: p < 0.0001<br>WFS1-WT vs. WFS1-OE: p = 0.0003<br>WFS1-KO vs. WFS1-OE: p < 0.0001                                                                                                                                                                                                                                                                                                                                                                                                                                                                                                                                                                                                                                                                                                                                                                                |
| 5D | One-way ANOVA             | p < 0.0001 | WFS1-WT vs. WFS1-KO: p < 0.0001<br>WFS1-WT vs. WFS1-OE: p = 0.4867<br>WFS1-KO vs. WFS1-OE: p = 0.0005                                                                                                                                                                                                                                                                                                                                                                                                                                                                                                                                                                                                                                                                                                                                                                                |
| 5F | Two-tailed student t-test | p = 0.0026 |                                                                                                                                                                                                                                                                                                                                                                                                                                                                                                                                                                                                                                                                                                                                                                                                                                                                                      |

## References

1. Schmittgen, T.D. and K.J. Livak, *Analyzing real-time PCR data by the comparative C(T) method*. Nat Protoc, 2008. **3**(6): p. 1101-8.
